# Supplementary material
Source: publisher figshare collection journal article supplement (https://rs.figshare.com/ndownloader/files/18137084)
Supplement: Supplementary file 1 [file 18137084]

## Sheet: SuppTable1
Supp Table 1. Behaviorally relevant genes* showing transcriptional convergence in vocal-learners striatum**
gene	module.x	kIN.x	kTotal.x	kIN.v	kTotal.v	kIN.x.adult	kTotal.x. adult	gs.n.motifs.x	q.gs.n.motifs.x	gs.tutor.pct. learning.x	q.gs.tutor.pct.learning.x	gs.ns.ud. entropy.effect	q.gs.ns.ud. entropy.effect	gs.motif. identity.x	q.gs.motif. identity.x	gs.motifs. adult	q.gs.motifs. adult	module.v	gs.n.motifs.v	q.gs.n.motifs.v	gs.tutor. pct.learning.v	q.gs.tutor. pct.learning.v	gs.ns.ud. entropy.effect.v	q.gs.ns.ud. entropy.effect.v	gs.motif. identity.v	q.gs.motif. identity.v
AGFG1	black	0.691546	0.472108	0.421637	0.331198	0.177856	0.0818702	-0.456	0.219533	0.208	0.606454	-0.715	0.00462742	0.166	0.688876	-0.59	0.0103	salmon	0.237927	0.672964	0.141782	1	-0.0704438	0.722824	-0.103561	0.773937
IVNS1ABP	black	0.189584	0.131212	NA	NA	NA	NA	-0.622	0.0788652	0.202	0.61538	-0.619	0.0136507	-0.0613	0.77394	NA	NA	NA	NA	NA	NA	NA	NA	NA	NA	NA
MGLL	black	0.562189	0.40807	NA	NA	0.0595812	0.0724183	-0.544	0.132221	-0.251	0.570678	-0.687	0.00660265	-0.225	0.636427	-0.451	0.0693	NA	NA	NA	NA	NA	NA	NA	NA	NA
PPP4R2	black	0.619552	0.519199	0.325127	0.239355	0.062713	0.09989	-0.705	0.0400591	-0.0138	0.767764	-0.712	0.00473634	0.0341	0.786545	-0.314	0.235	blue	0.0589665	0.738829	0.33658	1	0.243251	0.590962	0.0124876	0.829216
REEP3	black	0.576672	0.505501	0.13204	0.208852	0.69092	0.294145	-0.518	0.15457	0.177	0.636155	-0.568	0.0225611	0.162	0.692618	-0.739	0.000483	blue	0.172638	0.681818	-0.151237	1	-0.182435	0.636721	-0.405633	0.536674
RGS12	black	0.295665	0.309445	0.590709	0.0746357	NA	NA	-0.421	0.26013	-0.16	0.653324	-0.659	0.00883734	0.0387	0.783501	NA	NA	black	-0.0167151	0.769376	-0.210299	1	0.366767	0.495431	-0.158829	0.738072
TMCC3	black	0.706066	0.419647	0.113442	0.168887	0.351458	0.145319	-0.665	0.0548223	0.145	0.66798	-0.734	0.00354524	-0.108	0.738475	-0.637	0.00457	blue	0.132204	0.702351	-0.149224	1	-0.597157	0.229886	-0.28119	0.647486
NPTX2	blue	0.568714	0.193388	NA	NA	0.379105	0.178204	0.84	0.00375716	-0.0136	0.767764	0.542	0.0285412	-0.0975	0.747697	0.695	0.00142	NA	NA	NA	NA	NA	NA	NA	NA	NA
NTS	blue	0.208873	0.0910165	0.326981	0.096893	0.110152	0.0734513	0.654	0.0592189	0.182	0.632424	0.637	0.0113409	0.167	0.688642	0.319	0.226	tan	0.0613197	0.737628	-0.0334206	1	-0.114734	0.691986	0.00485799	0.832483
RCAN2	blue	0.376636	0.178786	0.392945	0.062454	0.775798	0.330607	0.852	0.00247433	-0.122	0.690264	0.137	0.270951	-0.187	0.674509	0.786	0.000117	black	-0.211415	0.672964	-0.217075	1	-0.0364118	0.749555	-0.492887	0.452286
SEMA7A	blue	0.502717	0.208681	0.408845	0.261941	0.16194	0.0924457	0.765	0.0202975	0.0698	0.729695	0.395	0.084229	-0.116	0.734266	0.43	0.0869	brown	-0.459532	0.672964	-0.078102	1	0.135256	0.673188	0.0881319	0.783784
USP31	brown	0.131793	0.0613865	NA	NA	0.565186	0.14618	-0.0513	0.694844	-0.225	0.592517	0.46	0.0542538	0.147	0.707612	-0.388	0.13	NA	NA	NA	NA	NA	NA	NA	NA	NA
DRD2	cyan	0.280331	0.126706	0.223445	0.124718	0.0623365	0.0452987	-0.379	0.310708	-0.463	0.364389	-0.298	0.143685	-0.17	0.686479	-0.23	0.382	brown	-0.0793824	0.729505	0.300422	1	0.436434	0.431303	0.427159	0.516474
SLC16A6	cyan	0.163091	0.0601408	NA	NA	NA	NA	-0.607	0.0891485	-0.0121	0.769224	0.305	0.139063	0.454	0.421044	NA	NA	NA	NA	NA	NA	NA	NA	NA	NA	NA
INPP5A	green	0.398313	0.397	0.667897	0.551976	NA	NA	-0.069	0.679019	0.376	0.43981	-0.263	0.169496	0.306	0.568144	NA	NA	blue	0.24283	0.672964	0.0415504	1	-0.0423822	0.745391	-0.270061	0.654032
PDE10A	green	0.123769	0.203129	0.11375	0.0986684	NA	NA	0.0394	0.703337	-0.0171	0.765333	-0.196	0.222168	0.244	0.620847	NA	NA	blue	-0.00740157	0.773361	-0.344153	1	-0.251429	0.584264	-0.64948	0.289488
RBMS1	green	0.400075	0.381992	0.690475	0.330905	0.752006	0.688547	0.0734	0.674588	0.477	0.354343	-0.254	0.175867	0.481	0.408825	0.128	0.553	salmon	0.111485	0.714299	-0.0450256	1	-0.232839	0.59722	-0.214739	0.694656
CA2	greenyellow	0.251113	0.0728614	NA	NA	0.0801286	0.10063	-0.0856	0.66541	0.275	0.545023	-0.249	0.179592	-0.064	0.770677	0.431	0.0855	NA	NA	NA	NA	NA	NA	NA	NA	NA
CDH7	greenyellow	0.171215	0.114702	0.425715	0.166691	0.161443	0.106008	-0.219	0.521573	0.213	0.602453	-0.511	0.0370599	-0.103	0.743228	-0.329	0.211	salmon	0.517752	0.672964	-0.114301	1	0.166035	0.651171	-0.283661	0.643815
PCDH8	greenyellow	0.36159	0.102481	0.811846	0.277258	NA	NA	-0.151	0.598956	0.42	0.401034	-0.402	0.0802787	-0.00927	0.799996	NA	NA	purple	-0.135463	0.699526	0.135385	1	0.0561998	0.732056	0.312531	0.619767
PGM2L1	greenyellow	0.0829004	0.0558863	NA	NA	NA	NA	-0.304	0.406415	-0.00976	0.770101	-0.025	0.360727	-0.0341	0.786545	NA	NA	NA	NA	NA	NA	NA	NA	NA	NA	NA
SYNPR	greenyellow	0.364352	0.268854	0.279501	0.314233	0.839314	0.163901	-0.00547	0.727867	0.526	0.32	-0.245	0.183414	0.33	0.532814	-0.314	0.234	turquoise	0.231132	0.672964	0.178468	1	-0.386408	0.477409	-0.15617	0.739227
VAMP1	greenyellow	0.382151	0.148291	0.122917	0.0700623	NA	NA	-0.148	0.602952	0.551	0.300357	-0.0367	0.351791	0.22	0.641704	NA	NA	yellow	-0.158048	0.688701	0.186818	1	0.134486	0.674317	0.0670697	0.796751
ATP2A2	grey60	0.458419	0.209302	0.363642	0.073459	0.366715	0.172242	0.079	0.67024	-0.173	0.640449	0.275	0.160568	0.131	0.722563	-0.101	0.59	black	-0.0207544	0.76678	-0.157638	1	-0.0202687	0.758766	-0.605612	0.31108
CAMTA1	grey60	0.262312	0.135456	0.332089	0.129461	0.185934	0.0962597	-0.00412	0.728894	0.0428	0.749902	0.472	0.0502296	0.551	0.371279	0.071	0.628	salmon	0.261477	0.672964	0.257254	1	0.41348	0.457147	-0.260575	0.661825
INIP	magenta	0.822676	0.27199	0.219522	0.11861	0.0345687	0.0740706	0.557	0.121179	-0.0848	0.719508	0.639	0.011055	-0.156	0.7009	0.545	0.0209	salmon	0.375691	0.672964	-0.114176	1	0.184458	0.63407	-0.106816	0.773937
CDH4	midnightblue	0.358404	0.0573963	NA	NA	0.231377	0.0678904	0.248	0.483144	-0.364	0.450031	0.103	0.299047	-0.277	0.593951	-0.0501	0.65	NA	NA	NA	NA	NA	NA	NA	NA	NA
GREM1	midnightblue	0.592385	0.115138	0.171183	0.0474056	0.0615749	0.0774824	0.259	0.470149	-0.275	0.545023	0.0387	0.350479	-0.308	0.564032	0.213	0.414	grey60	-0.257364	0.672964	-0.166466	1	-0.0725475	0.720745	-0.167298	0.729281
HPCAL4	midnightblue	0.54148	0.0684814	NA	NA	0.0845536	0.082691	0.124	0.628963	-0.101	0.706683	0.232	0.193267	0.106	0.739648	-0.0257	0.674	NA	NA	NA	NA	NA	NA	NA	NA	NA
PPP2R2B	orange	0.331663	0.137214	NA	NA	0.186606	0.0911324	-0.462	0.212242	-0.172	0.640449	-0.806	0.00101346	-0.436	0.436795	0.0882	0.606	NA	NA	NA	NA	NA	NA	NA	NA	NA
SV2B	orange	0.285095	0.0970718	NA	NA	0.180089	0.164063	-0.428	0.252603	-0.0904	0.716582	-0.471	0.05062	-0.094	0.749625	-0.0393	0.661	NA	NA	NA	NA	NA	NA	NA	NA	NA
ABHD5	pink	0.122148	0.205741	0.37776	0.414671	NA	NA	-0.143	0.607955	0.0436	0.749428	-0.648	0.00989851	-0.131	0.722757	NA	NA	turquoise	0.0679119	0.733597	-0.100893	1	-0.260622	0.58224	0.00625092	0.832483
GALNT1	pink	0.310077	0.471018	0.568497	0.458385	0.0800182	0.0767636	-0.0321	0.708417	0.491	0.344406	-0.483	0.0462164	0.191	0.67149	0.246	0.352	blue	0.291695	0.672964	0.0560463	1	-0.0353776	0.750262	-0.280088	0.647726
SLC6A1	pink	0.626172	0.712443	0.404095	0.339617	0.289882	0.13708	-0.371	0.321892	0.108	0.702675	-0.457	0.0554477	0.372	0.497894	-0.598	0.00899	blue	0.205441	0.672964	-0.0937623	1	0.0443834	0.743781	-0.389976	0.542549
ANLN	purple	0.0609234	0.0751251	0.29605	0.128769	NA	NA	-0.326	0.379783	0.223	0.594404	-0.149	0.260867	0.227	0.635501	NA	NA	lightcyan	0.227165	0.672964	0.135488	1	0.098185	0.70323	0.122196	0.765307
MBP	purple	0.61563	0.477061	0.325464	0.146069	0.141253	0.0540873	-0.0598	0.686733	0.278	0.542664	-0.352	0.108408	0.378	0.495232	-0.336	0.2	salmon	0.149243	0.690873	-0.0364136	1	0.143797	0.665956	-0.101869	0.775058
SLC6A6	royalblue	0.769137	0.263036	0.45382	0.0927687	0.131389	0.0660898	0.518	0.15457	0.108	0.702222	0.0472	0.343883	0.2	0.659143	0.312	0.237	grey60	0.0149432	0.770429	-0.243171	1	-0.0788863	0.715355	-0.404411	0.53733
ST18	royalblue	0.152644	0.0716395	0.593845	0.222184	NA	NA	0.379	0.310708	-0.0743	0.725594	-0.472	0.0501726	-0.46	0.419965	NA	NA	magenta	0.333097	0.672964	-0.113493	1	-0.102923	0.701649	-0.0443715	0.812321
CPLX1	turquoise	0.442081	0.42994	0.396564	0.525272	0.122054	0.127842	0.00336	0.728894	-0.0113	0.769289	-0.2	0.218687	0.355	0.512837	-0.199	0.438	blue	0.428767	0.672964	0.120767	1	0.029402	0.755013	0.00802572	0.832031
KIAA2022	turquoise	0.0962491	0.129689	NA	NA	0.0730483	0.108625	-0.329	0.376685	-0.228	0.590175	-0.317	0.130378	-0.0209	0.793965	-0.366	0.157	NA	NA	NA	NA	NA	NA	NA	NA	NA
ABTB2	white	0.255232	0.159475	NA	NA	0.100949	0.08092	-0.197	0.54831	-0.0871	0.719508	-0.27	0.164283	-0.401	0.468245	-0.356	0.17	NA	NA	NA	NA	NA	NA	NA	NA	NA
EFHD1	white	0.119869	0.0824469	NA	NA	0.162916	0.0810442	-0.0819	0.668184	0.00257	0.77594	-0.533	0.0310836	-0.0863	0.756072	-0.0201	0.68	NA	NA	NA	NA	NA	NA	NA	NA	NA
PAQR8	white	0.144039	0.101273	NA	NA	0.124626	0.079009	-0.0893	0.660419	0.0921	0.714528	-0.0411	0.3487	-0.0259	0.791475	-0.193	0.447	NA	NA	NA	NA	NA	NA	NA	NA	NA
SLC6A9	white	0.406402	0.208252	NA	NA	0.191294	0.197422	0.109	0.646196	-0.0297	0.759284	-0.00481	0.377222	-0.292	0.576123	0.0462	0.654	NA	NA	NA	NA	NA	NA	NA	NA	NA
TMBIM1	white	0.116846	0.113555	NA	NA	NA	NA	0.108	0.646196	0.148	0.663972	-0.1	0.301322	-0.136	0.716638	NA	NA	NA	NA	NA	NA	NA	NA	NA	NA	NA
*Genes present in our Juvenile Area X gene co-expression network (Burkett et al, 2018)
**Genes showing transcriptional convergence between the Area X of the songbird basal ganglia and the human putamen (Pfenning et al, 2014)
The gene MGLL discussed in this paper is in bold
